# Supplementary material
Source: PubMed Central journal article supplement (PMC6690171)
Supplement: asz023_supplementary_material.pdf [file asz023_supplementary_material.pdf]

## Supplementary material for 'Nonidentifiability in the presence of factorization for truncated data'

BY B. VAKULENKO-LAGUN

*Department of Biostatistics, Harvard T.H. Chan School of Public Health,*  
*655 Huntington Avenue, Boston, Massachusetts 02115, U.S.A.*  
blagun@hsph.harvard.edu

5

J. QIAN

*Department of Biostatistics and Epidemiology, University of Massachusetts,*  
*715 N. Pleasant Street, Amherst, Massachusetts 01003, U.S.A.*  
qian@schoolph.umass.edu

10

S. H. CHIOU AND R. A. BETENSKY

*Department of Biostatistics, Harvard T.H. Chan School of Public Health,*  
*655 Huntington Avenue, Boston, Massachusetts 02115, U.S.A.*  
schiou@hsph.harvard.edu betensky@hsph.harvard.edu

15

### APPENDIX A

Under factorization condition (2), we can derive an explicit expression for  $a(t)$  as a function of  $G(t)$ ,  $F(x)$  and  $c(t, x)$ . For this, we represent  $\text{pr}(T \in dt)$  as

$$\begin{aligned}\text{pr}(T \in dt) &= dG(t) = \text{pr}(T \in dt \mid X > t) \text{pr}(X > t) + \text{pr}(T \in dt \mid X < t) \text{pr}(X < t) \\ &= dA(t) \text{pr}(X > t) + \text{pr}(T \in dt \mid X < t) \text{pr}(X < t),\end{aligned}$$

20

which implies that

$$dA(t) = \left\{ dG(t) - \int_{x=0}^t \text{pr}(T \in dt \mid X = x) dF(x) \right\} / \text{pr}(X > t),$$

i.e.,  $a(t) = g(t)b(t)$ , where

$$b(t) = \left\{ 1 - g(t)^{-1} \int_0^t c(t, x) dF(x) \right\} / \text{pr}(X > t)$$

for  $g(t) > 0$  and  $b(t) = 0$  for  $g(t) = 0$ . When quasi-independence (1) does not hold,  $b(t) \neq 1$ .

Overall independence and quasi-independence between  $T$  and  $X$  arise under certain restrictions on these functions. For example, under factorization condition (2), the functions  $a(t)$ ,  $b(t)$  and  $c(t, x)$  satisfy the following:

- (i) Under overall independence of  $T$  and  $X$ , i.e., independence in both the observable and the unobservable regions,  $a(t) = g(t)$  and  $c(t, x) = g(t)$ , and thus  $b(t) = 1$ .

25

- (ii) Under quasi-independence (1),  $a(t) = g(t)$  and hence  $b(t) = 1$ , but  $c(t, x)$  is not necessarily equal to  $g(t)$ . In fact,  $c(t, x)$  could be a function of both  $t$  and  $x$ . One example of this is given by selecting  $f(x)$ , then determining  $g(x) \geq 0$  through

$$\frac{g(x)}{1 - G(x)} = \frac{xf'(x)}{xf(x) - F(x)} \quad (\text{A1})$$

where  $f'(x)$  is the derivative of  $f(x)$ , and finally setting  $c(t, x) = g(t)F(t)/\{tf(x)\}$  for  $t > x$ . It is straightforward to verify that this choice of  $g(x)$  given  $f(x)$  satisfies both constraints listed in § 1 of the main paper after (2), as well as  $a(t) = g(t)$ . Note that this choice of  $g(x)$  requires that  $xf(x) > F(x)$  for all  $x$ , which in turn requires that the support of  $f$  be bounded, or else  $f(x) \geq 1/(2x)$  for all sufficiently large  $x$ , which violates integrability. In addition, (A1) implies that

$$\frac{d}{dx} [-\log\{1 - G(x)\}] = \frac{d}{dx} [\log\{xf(x) - F(x)\}],$$

so that for some positive constant  $C$ ,  $1 - G(x) = C/\{xf(x) - F(x)\}$ . This implies that  $f$  must be bounded from below; otherwise, as  $x$  goes to 0, the left-hand side would approach 1 and the right-hand side  $\infty$ . Thus, in this example  $X$  has to have a bounded support,  $[b, B]$ , with  $b > 0$  and  $B < \infty$ . This is plausible in many contexts. In addition, it must be that  $C/\{xf(x) - F(x)\} \leq 1$ , and it should be a nonincreasing function. This implies that  $xf'(x) \geq 0$ . If  $X$  is a nonnegative random variable,  $f(x)$  should be a nondecreasing density, which is possible if the support of  $X$  is bounded.

## APPENDIX B

Under complete independence between  $T$  and  $X$ , the Kaplan–Meier estimator (4), the non-parametric maximum likelihood estimator for  $S(x)$ , was shown to be uniformly consistent for  $S(x)$  by Woodroffe (1985) for left-truncated data, and by Andersen et al. (1993, Theorem IV.3.1) for left-truncated and right-censored data. The likelihoods that contribute to estimation of  $S(x)$  are identical and equal to  $L_2$  under any of three conditions: complete independence between  $T$  and  $X$ , quasi-independence (1), or factorization (2). Hence, the estimator (4) is the nonparametric maximum likelihood estimator of  $S(x)$  under (1) or (2) as well, and its uniform consistency can be proved in the same way as under complete independence between  $X$  and  $T$ .

Moreover, the Kaplan–Meier estimator (4) is consistent under any of three factorization conditions, but it is a consistent estimator for different parameters. Under conditions (1) or (2), it is a consistent estimator of  $S(x)$ ; and under condition (5) without quasi-independence, it is a consistent estimator of  $1 - A^*(x)$ . Nonidentifiability arises because we cannot know what we estimate,  $S(x)$  or  $1 - A^*(x)$ .

Here we show that under factorization condition (5) without quasi-independence, for both censoring models, although  $S(x)$  is nonidentifiable,  $G(t)$  is identifiable. Under both models for censoring, the overall likelihood for left-truncated and right-censored data can be expressed as

$$\prod_{i=1}^n \text{pr}(Y \in dy_i, \delta = \delta_i, T \in dt_i \mid T < X) \propto \tilde{L}_1^* \tilde{L}_2^* \tilde{L}_3^*$$

where

$$\tilde{L}_1^* = 1, \quad \tilde{L}_2^* = \prod_{i=1}^n \frac{\text{pr}(X \in dy_i | T = t_i)^{\delta_i} \text{pr}(X > y_i | T = t_i)^{1-\delta_i} I(t_i < y_i)}{\text{pr}(X > t_i | T = t_i)},$$

$$\tilde{L}_3^* = \prod_{i=1}^n \frac{\text{pr}(X > t_i | T = t_i) \text{pr}(T \in dt_i)}{\int_0^\infty \text{pr}(X > u | T = u) \text{pr}(T \in du)}.$$

Under (5),  $\tilde{L}_2^* \tilde{L}_3^*$  depends on  $\text{pr}(X = x | T = t)$  and  $G(t)$ , whereas under (1)  $\tilde{L}_2^* \tilde{L}_3^*$  depends on  $S(x)$  and  $G(t)$ . Since in nonparametric estimation the likelihood  $\tilde{L}_2^* \tilde{L}_3^*$  is the same under (1) and under (5), we cannot distinguish the parameter  $S(x)$  from  $A^*(x) = \text{pr}(X = x | T = t)$ , but  $G(t)$  is identifiable. 55

Under (5), the estimation of two parameters,  $\text{pr}(X = x | T = t)$  and  $G(t)$ , can be done in two steps. First, the nonparametric maximum likelihood estimator of

$$\text{pr}(X > t | T = t) = \int_t^\infty a^*(x) dx = 1 - A^*(t)$$

is the estimator (6) in the main paper, the standard Kaplan–Meier estimator that accounts for delayed entry and right censoring. It can be shown that the estimator (6) maximizes  $\tilde{L}_2^*$ . Second, the nonparametric maximum likelihood estimator of  $G(t)$  is the estimator (7) in the main paper, with the nonparametric maximum likelihood estimator of  $\text{pr}(X > t | T = t)$  found in the first step plugged in for  $\hat{S}(t)$ . This nonparametric maximum likelihood estimator of  $G(t)$  is derived from maximization of  $\tilde{L}_3^*$ , which has a multinomial structure. 60

We note that under (5) and right censoring, we do not need the estimator of  $S(t)$  in order to estimate  $G(t)$ . But we need the estimator of  $\text{pr}(X > t | T = t)$  whatever it estimates. Under (5) without quasi-independence,  $\text{pr}(X > t | T = t) = \int_t^\infty a^*(x) dx$ . Under quasi-independence,  $\text{pr}(X > t | T = t) = S(t)$ . 65

We also remark that under left truncation, there exists another standard identifiability problem, where instead of  $S(x)$  we can only identify the conditional survival function  $S(x)/S(t_1)$  for  $x > t_1$ , where  $t_1 = \min\{t_1, \dots, t_n\}$  (Andersen et al., 1993, p. 264). 70

## REFERENCES

- ANDERSEN, P., BORGAN, O., GILL, R. D. & KEIDING, N. (1993). *Statistical Models Based on Counting Processes*. New York: Springer.
- WOODROOFE, M. (1985). Estimating a distribution function with truncated data. *Ann. Statist.* **13**, 163–77.
